# Supplementary material for: Expression patterns and relevance of UQCRFS1, an emerging prognostic marker in gastric cancer
Source: Research Square preprint supplement (doi:10.21203/rs.3.rs-6542786/v1), 2025-06-18
Supplement: Supplementary file 1 [file 4906706faa52b01f2fb243fc.docx]

Table 1 Correlation between expression of UQCRFS1 and clinicopathological parameters

| Variables | UQCRFS1 expression | | *P* value |
| --- | --- | --- | --- |
| Negative | Positive |
| Age (years)  < 60  ≥ 60 | 37 (35.9)  66 (64.1) | 20 (26.3)  56 (73.7) | 0.196 |
| Gender  Male  Female | 71 (68.9)  32 (31.1) | 55 (72.4)  21 (27.6) | 0.741 |
| Histologic type  Differentiated  Undifferentiated | 44 (42.7)  59 (57.3) | 31 (40.8)  45 (59.2) | 0.878 |
| Lauren classification  Intestinal  Diffuse  Mixed | 47 (45.6)  37 (35.9)  19 (18.5) | 27 (35.5)  25 (32.9)  24 (31.6) | 0.053 |
| Lymphatic invasion  Absent  Present | 59 (57.3)  44 (42.7) | 36 (47.4)  40 (52.6) | 0.226 |
| Venous invasion  Absent  Present | 81 (78.6)  22 (21.4) | 58 (76.3)  18 (23.7) | 0.720 |
| Perineural invasion  Absent  Present | 85 (82.5)  18 (17.5) | 60 (78.9)  16 (21.1) | 0.568 |
| T stage  T1  T2-4 | 61 (59.2)  42 (40.8) | 28 (36.8)  48 (63.2) | 0.004 |
| N stage  N0  N1-3 | 66 (64.1)  37 (35.9) | 44 (57.9)  32 (42.5) | 0.439 |
| TNM stage  I  II  III | 64 (62.1)  18 (17.5)  21 (20.4) | 37 (48.7)  17 (22.4)  22 (28.9) | 0.073 |
| MMR  MSS  MSI | 91 (88.3)  12 (11.7) | 58 (76.3)  18 (23.7) | 0.043 |
| EBV  Negative  Positive | 94 (91.3)  9 (8.7) | 70 (92.1)  6 (7.9) | 0.533 |

Values are presented as number (%)
